# Supplementary material for: The molecular interplay of the establishment of an infection – gene expression of Diaphorina citri gut and Candidatus Liberibacter asiaticus
Source: PubMed Central journal article supplement (PMC8454146; doi:10.1186/s12864-021-07988-2), 2021-09-21
Supplement: 12864_2021_7988_MOESM2_ESM.pdf [file 12864_2021_7988_MOESM2_ESM.pdf]

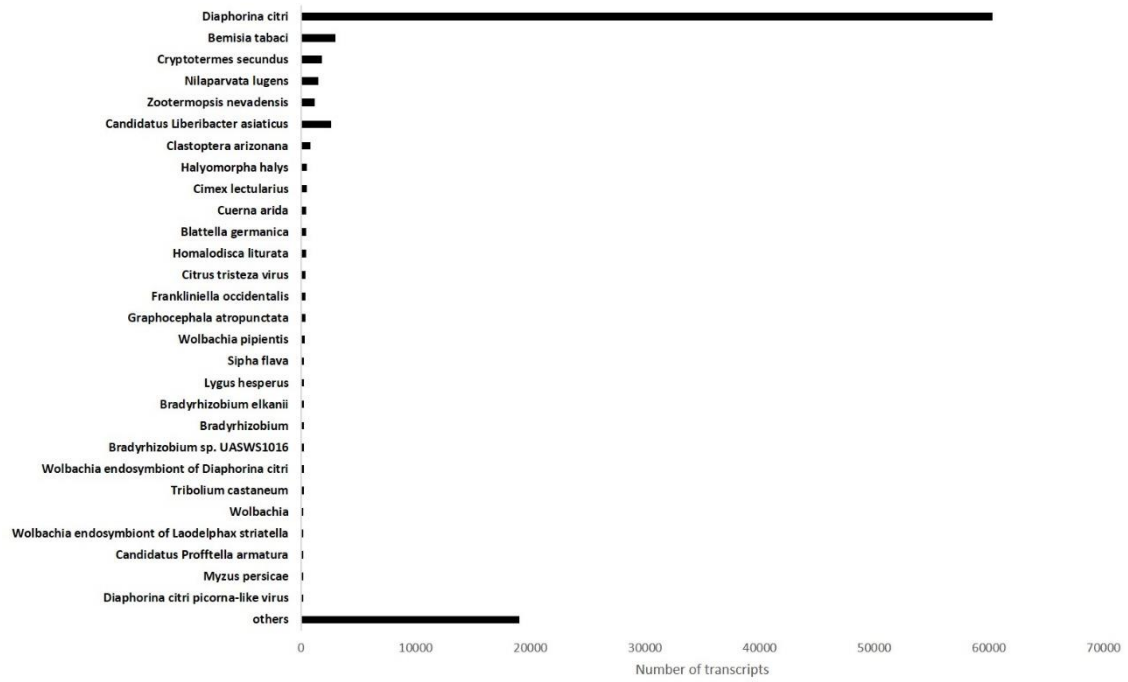

**Additional file 2.** Distribution of alignments and transcripts of *de novo* assembly of *Diaphorina citri* gut that fed on health and CLAs-infected citrus plant, after search for similarity in NCBI databank.
