# Supplementary material for: The molecular interplay of the establishment of an infection – gene expression of Diaphorina citri gut and Candidatus Liberibacter asiaticus
Source: PubMed Central journal article supplement (PMC8454146; doi:10.1186/s12864-021-07988-2), 2021-09-21
Supplement: 12864_2021_7988_MOESM3_ESM.pdf [file 12864_2021_7988_MOESM3_ESM.pdf]

**Additional file 3.** Differentially expressed CLas genes in the gut of *Diaphorina citri* adults after 1-2 d (*A1CLas*<sup>+</sup>), 3-4 d (*A2CLas*<sup>+</sup>) and 5-6 d (*A3CLas*<sup>+</sup>) of infection by feeding on CLas-infected citrus plants.

| Comparison | Annotation                                                                   | Transcript ID     | FC   | FDR                 |
|------------|------------------------------------------------------------------------------|-------------------|------|---------------------|
|            | 2-octaprenyl-6-methoxyphenyl hydroxylase                                     | DN14876_c0_g1_i1  | 13.9 | 0.02                |
|            | 5-(carboxyamino)imidazole ribonucleotide synthase                            | DN14087_c0_g1_i2  | 12.6 | 0.03                |
|            | 50S ribosomal protein L2                                                     | DN11710_c0_g1_i2  | 16.9 | 0.04                |
|            | AAA family ATPase                                                            | DN1679_c0_g1_i1   | 13.8 | 0.05                |
|            | alanine--tRNA ligase                                                         | DN14954_c0_g1_i1  | 17.2 | 0.01                |
|            | alpha/beta hydrolase                                                         | DN39212_c0_g1_i1  | 14.0 | 0.01                |
|            | amino acid ABC transporter permease                                          | DN15630_c0_g2_i3  | 14.1 | 0.02                |
|            | argininosuccinate lyase                                                      | DN13884_c0_g1_i1  | 13.4 | 0.01                |
|            | aspartate aminotransferase                                                   | DN14989_c0_g1_i4  | 12.0 | 0.02                |
|            | aspartate aminotransferase family protein                                    | DN11157_c0_g1_i1  | 13.9 | 0.03                |
|            | ATP-dependent protease ATPase subunit HslU                                   | DN20210_c0_g3_i1  | 12.0 | 0.03                |
|            | beta-ketoacyl-ACP synthase I                                                 | DN14910_c0_g1_i1  | 13.8 | 0.04                |
|            | bifunctional glutamate N-acetyltransferase/amino-acid acetyltransferase ArgJ | DN10638_c0_g1_i1  | 14.6 | 0.03                |
|            | carbamoyl phosphate synthase small subunit                                   | DN13724_c0_g1_i1  | 19.0 | 9.3e <sup>-3</sup>  |
|            | Chloramphenicol-sensitive protein rarD                                       | DN13473_c0_g1_i1  | 17.2 | 0.05                |
|            | chromosomal replication initiation protein                                   | DN15038_c0_g1_i2  | 16.8 | 7.41e <sup>-3</sup> |
|            | cold-shock protein                                                           | DN10086_c0_g2_i1  | 20.0 | 0.02                |
|            | DEAD/DEAH box helicase                                                       | DN4052_c0_g1_i1   | 24.2 | 0.02                |
|            | DNA polymerase III subunit chi                                               | DN12825_c0_g1_i1  | 11.2 | 0.04                |
|            | DNA topoisomerase I                                                          | DN14080_c0_g1_i1  | 11.9 | 0.04                |
|            | DNA topoisomerase IV subunit B                                               | DN10717_c0_g1_i1  | 37.8 | 8.87e <sup>-4</sup> |
|            | DNA translocase FtsK                                                         | DN14450_c0_g1_i1  | 22.7 | 2.49e <sup>-3</sup> |
|            | DUF1874 domain-containing protein                                            | DN14305_c0_g1_i1  | 31.4 | 9.46e <sup>-4</sup> |
|            | elongation factor G                                                          | DN17043_c0_g1_i1  | 14.2 | 0.05                |
|            | elongation factor P                                                          | DN12683_c0_g1_i1  | 31.9 | 0.01                |
|            | elongation factor Ts                                                         | DN14637_c0_g1_i1  | 11.1 | 0.04                |
|            | excinuclease ABC subunit C                                                   | DN45886_c0_g1_i1  | 14.8 | 0.03                |
|            | exodeoxyribonuclease VII large subunit                                       | DN17192_c0_g4_i3  | 14.0 | 9.3e <sup>-3</sup>  |
|            | exonuclease I                                                                | DN15585_c7_g1_i1  | 11.2 | 0.02                |
|            | fumarate hydratase                                                           | DN14954_c0_g1_i2  | 23.9 | 6.8e <sup>-3</sup>  |
|            | glutaminase                                                                  | DN14270_c0_g1_i1  | 13.0 | 0.03                |
|            | glutathione S-transferase                                                    | DN4544_c0_g1_i1   | 17.5 | 0.04                |
|            | glycerol kinase                                                              | DN16960_c2_g1_i14 | 34.4 | 0.01                |
|            | glycine/betaine ABC transporter substrate-binding protein                    | DN15178_c0_g1_i1  | 33.1 | 2.07e <sup>-3</sup> |
|            | hypothetical protein                                                         | DN14113_c1_g1_i1  | 16.2 | 0.02                |

\**A1CLas*<sup>+</sup> x \*\*\**A3CLas*<sup>+</sup>

|                                                                               |                  |      |              |
|-------------------------------------------------------------------------------|------------------|------|--------------|
| hypothetical protein                                                          | DN17456_c0_g1_i2 | 23.7 | 0.01         |
| hypothetical protein                                                          | DN17456_c0_g1_i3 | 14.2 | 0.03         |
| hypothetical protein                                                          | DN17456_c0_g1_i4 | 22.0 | $3.66e^{-3}$ |
| hypothetical protein                                                          | DN17456_c0_g2_i1 | 17.3 | 0.04         |
| hypothetical protein CGUJ_01660                                               | DN14113_c0_g2_i1 | 16.5 | 0.05         |
| hypothetical protein DJ66_0664                                                | DN16265_c0_g2_i2 | 30.5 | $1.15e^{-3}$ |
| IMP dehydrogenase                                                             | DN6964_c0_g2_i1  | 13.6 | 0.03         |
| isocitrate dehydrogenase                                                      | DN15328_c0_g1_i1 | 13.5 | 0.06         |
| leucyl aminopeptidase                                                         | DN13997_c0_g1_i1 | 34.9 | 0.02         |
| LuxR family transcriptional regulator                                         | DN14940_c0_g2_i1 | 11.9 | 0.05         |
| molecular chaperone DnaK                                                      | DN15220_c0_g1_i1 | 28.2 | 0.01         |
| molecular chaperone GroEL                                                     | DN14757_c0_g1_i1 | 20.2 | 0.03         |
| N-acetyl-gamma-glutamyl-phosphate reductase                                   | DN15330_c0_g1_i2 | 14.7 | 0.05         |
| NADH dehydrogenase                                                            | DN15210_c0_g1_i2 | 14.4 | 0.03         |
| NifU family protein                                                           | DN5715_c0_g1_i1  | 11.8 | 0.05         |
| nitrate ABC transporter ATP-binding protein                                   | DN14488_c0_g2_i1 | 12.8 | 0.03         |
| orotidine 5'-phosphate decarboxylase/BAX inhibitor (BI)-1/YccA family protein | DN14873_c0_g1_i1 | 13.5 | 0.04         |
| PAS domain-containing sensor histidine kinase                                 | DN14346_c0_g1_i1 | 13.9 | 0.02         |
| penicillin-binding protein                                                    | DN14783_c0_g1_i1 | 11.9 | 0.03         |
| periplasmic solute binding protein                                            | DN15099_c0_g1_i1 | 9.7  | 0.04         |
| permease                                                                      | DN13997_c0_g2_i1 | 14.8 | 0.03         |
| peroxiredoxin                                                                 | DN17546_c4_g1_i1 | 13.5 | 0.03         |
| phage repressor protein                                                       | DN15458_c0_g2_i5 | 20.6 | 0.03         |
| phosphopyruvate hydratase                                                     | DN14337_c0_g1_i1 | 9.4  | 0.03         |
| phosphoribosylformylglycinamide cyclo-ligase                                  | DN27217_c0_g1_i1 | 17.8 | $4.73e^{-3}$ |
| pilus assembly protein                                                        | DN13708_c0_g1_i2 | 10.8 | 0.03         |
| poly(A) polymerase                                                            | DN12871_c0_g1_i1 | 11.9 | 0.05         |
| porin                                                                         | DN10141_c0_g1_i1 | 86.2 | $5.55e^{-4}$ |
| porin family protein                                                          | DN15690_c0_g1_i2 | 19.8 | 0.03         |
| putative protease IV transmembrane protein                                    | DN14809_c0_g1_i2 | 12.7 | 0.05         |
| pyridoxine 5'-phosphate synthase                                              | DN15414_c0_g1_i4 | 19.1 | 0.01         |
| pyruvate kinase/carbamoyl phosphate synthase large subunit                    | DN15141_c0_g1_i1 | 15.8 | 0.04         |
| replicative DNA helicase                                                      | DN15002_c0_g1_i2 | 20.9 | 0.03         |
| response regulator                                                            | DN12200_c0_g1_i1 | 16.8 | 0.02         |
| ribonuclease D                                                                | DN10298_c0_g1_i1 | 16.4 | 0.03         |
| signal recognition particle protein                                           | DN15243_c0_g1_i2 | 38.6 | $1.17e^{-3}$ |
| succinyl-diaminopimelate desuccinylase                                        | DN14376_c0_g1_i1 | 12.7 | 0.03         |
| sulfonate ABC transporter permease                                            | DN15690_c0_g1_i1 | 10.2 | 0.03         |
| TerC family protein                                                           | DN11390_c0_g1_i1 | 10.8 | 0.05         |
| tetratricopeptide repeat protein                                              | DN14826_c0_g1_i2 | 16.4 | $8.26e^{-3}$ |
| thioredoxin-dependent thiol peroxidase                                        | DN10526_c0_g1_i1 | 10.8 | 0.05         |

|  |                                                              |                   |       |              |
|--|--------------------------------------------------------------|-------------------|-------|--------------|
|  | threonine--tRNA ligase                                       | DN10111_c0_g1_i1  | 11.8  | 0.04         |
|  | thymidylate kinase                                           | DN14879_c0_g1_i1  | 13.2  | 0.03         |
|  | TIGR02300 family protein                                     | DN20462_c0_g8_i1  | 13.9  | 0.03         |
|  | translation initiation factor IF-3                           | DN14949_c0_g2_i1  | 14.6  | 0.03         |
|  | trigger factor                                               | DN13945_c0_g1_i1  | 11.5  | 0.04         |
|  | tRNA(5-methylaminomethyl-2-thiouridylate)- methyltransferase | DN53941_c0_g1_i1  | 17.1  | 0.05         |
|  | tRNA-dihydrouridine synthase A                               | DN14326_c0_g1_i1  | 14.2  | 0.02         |
|  | two-component system sensor histidine kinase AtoS            | DN14305_c0_g2_i1  | 20.4  | 0.04         |
|  | type I methionyl aminopeptidase                              | DN13945_c0_g2_i1  | 16.4  | $7.51e^{-3}$ |
|  | ubiquinone biosynthesis protein UbiB                         | DN13521_c0_g1_i1  | 9.8   | 0.03         |
|  | <hr/>                                                        |                   |       |              |
|  | 3-oxoacyl-ACP synthase                                       | DN17762_c4_g2_i2  | 36.8  | $1.85e^{-3}$ |
|  | bordetella phage Bbp38 like protein                          | DN15458_c0_g2_i1  | 9.6   | 0.03         |
|  | cell wall-associated hydrolase                               | DN19816_c1_g6_i1  | 42.2  | 0.02         |
|  | Chloramphenicol-sensitive protein rarD                       | DN13473_c0_g1_i1  | 7.5   | 0.05         |
|  | DEAD/DEAH box helicase                                       | DN4052_c0_g1_i1   | 9.7   | 0.02         |
|  | dicarboxylate/amino acid:cation symporter                    | DN14605_c0_g1_i1  | 7.0   | 0.04         |
|  | DNA topoisomerase IV subunit B                               | DN10717_c0_g1_i1  | 8.2   | 0.05         |
|  | ferrochelataase                                              | DN15257_c0_g1_i1  | 7.0   | 0.01         |
|  | glycerol kinase                                              | DN16085_c2_g1_i12 | 38.8  | $2.50e^{-4}$ |
|  | glycerol kinase                                              | DN16960_c2_g1_i14 | 24.0  | $3.44e^{-3}$ |
|  | glycine/betaine ABC transporter substrate-binding protein    | DN15178_c0_g1_i1  | 135.0 | $3.57e^{-4}$ |
|  | helix-turn-helix transcriptional regulator                   | DN15227_c0_g1_i1  | 36.9  | 0.05         |
|  | HsdR family type I site-specific deoxyribonuclease           | DN14127_c0_g1_i1  | 11.3  | $5.14e^{-3}$ |
|  | hypothetical protein                                         | DN10205_c0_g1_i1  | 13.1  | 0.02         |
|  | hypothetical protein                                         | DN14146_c0_g1_i1  | 7.3   | 0.06         |
|  | hypothetical protein                                         | DN17456_c0_g1_i4  | 7.1   | 0.02         |
|  | phage repressor protein/Prophage antirepressor               | DN15458_c0_g2_i5  | 16.5  | $5.14e^{-3}$ |
|  | phenylalanine--tRNA ligase subunit beta                      | DN14949_c0_g1_i2  | 19.9  | 0.02         |
|  | SAM-dependent methyltransferase                              | DN13350_c0_g1_i2  | 38.0  | $2.35e^{-4}$ |
|  | threonine--tRNA ligase                                       | DN10111_c0_g1_i1  | 8.9   | 0.01         |

\*\*A2CLas+ x A3CLas+

\*A1CLas<sup>+</sup>: adults that fed on CLas-infected citrus plant for 1-2 days;

\*\*A2CLas<sup>+</sup>: adults that fed on CLas-infected citrus plant for 3-4 days; and

\*\*\*A3CLas<sup>+</sup>: adults that fed on CLas-infected citrus plant for 5-6 days.
